# Supplementary material for: Highly optically and thermally stable carbon dots enabled by thermal annealing for laser illumination
Source: Royal Society of Chemistry journal article supplement (doi:10.1039/d2tc05359d), 2023-01-01
Supplement: d2tc05359d1.pdf [file d2tc05359d1.pdf]

## Supporting information

### High optical and thermal stable carbon dots enabled by thermal treatment for laser illumination

Xinghua Liu<sup>a</sup>, Lingpeng Yan<sup>b, c</sup>, Jingxia Zheng<sup>a, c</sup>, Yongzhen Yang<sup>a, c\*</sup>,  
Xuguang Liu<sup>b, c\*</sup>, Bingshe Xu<sup>a, c</sup>

<sup>a</sup> Key Laboratory of Interface Science and Engineering in Advanced Materials, Ministry of Education, Taiyuan University of Technology, Taiyuan 030024, China

<sup>b</sup> College of Materials Science and Engineering, Taiyuan University of Technology, Taiyuan 030024, China

<sup>c</sup> Shanxi-Zheda Institute of Advanced Materials and Chemical Engineering, Taiyuan 030032, China

Corresponding author: yzytyut@126.com (Yongzhen Yang);

liuxuguang@tyut.edu.cn (Xuguang Liu)

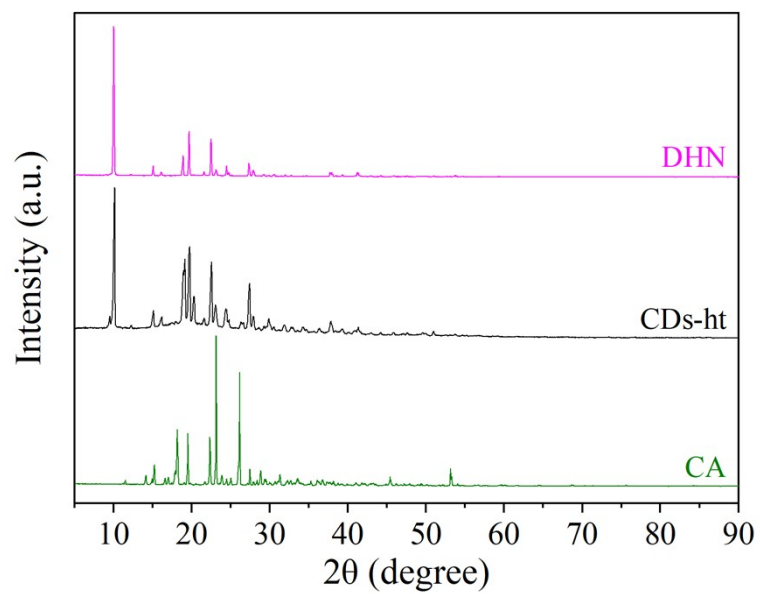

**Fig. S1.** XRD patterns of DHN, CA, and CDs-ht

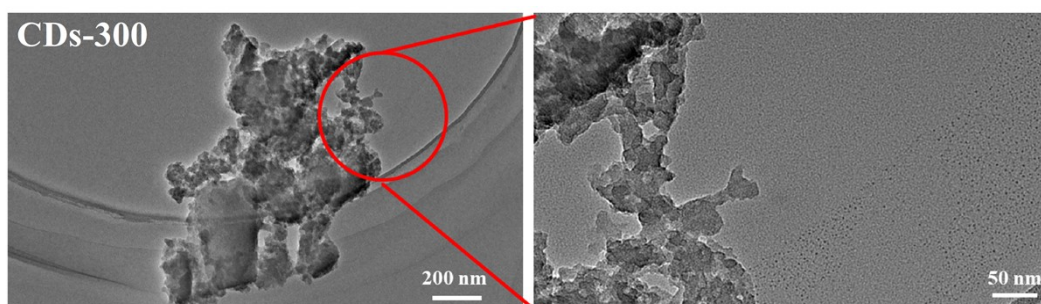

**Fig. S2.** TEM images of CDs-300

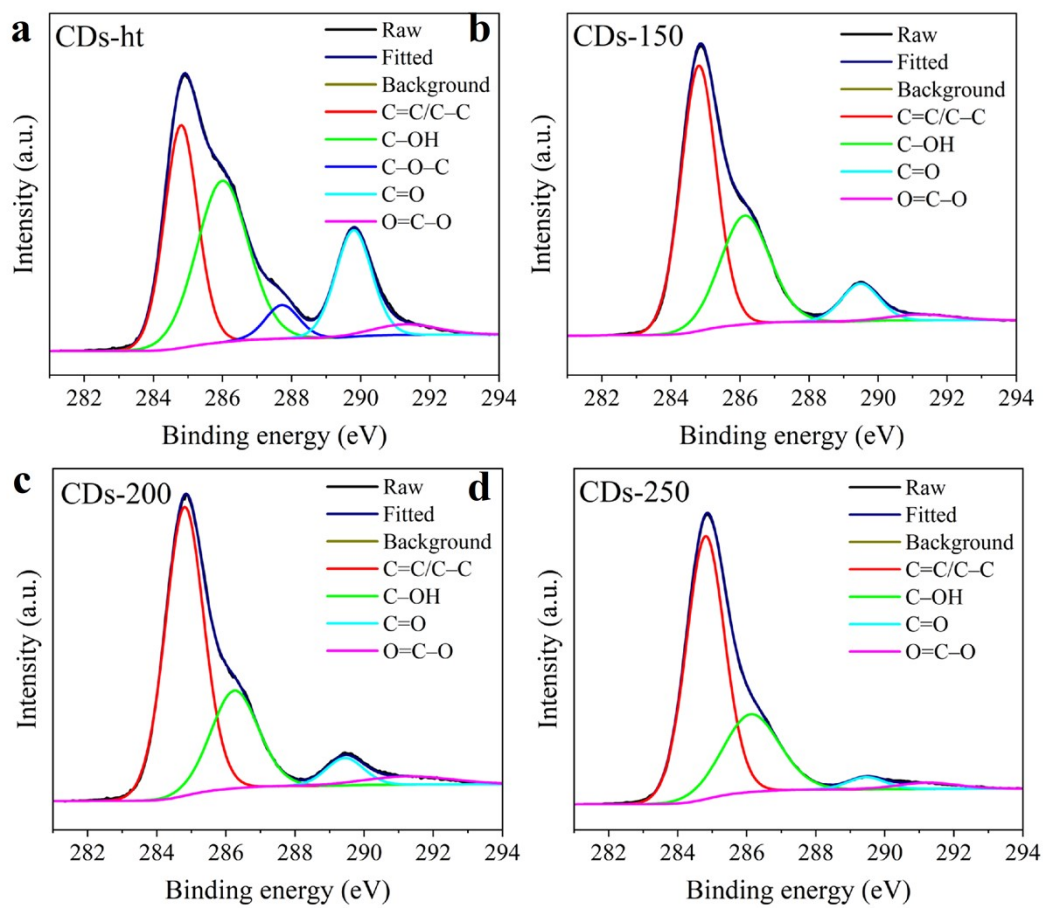

**Fig. S3.** High resolution C 1s XPS spectra of (a) CDs-ht,

(b) CDs-150, (c) CDs-200, and (d) CDs-250

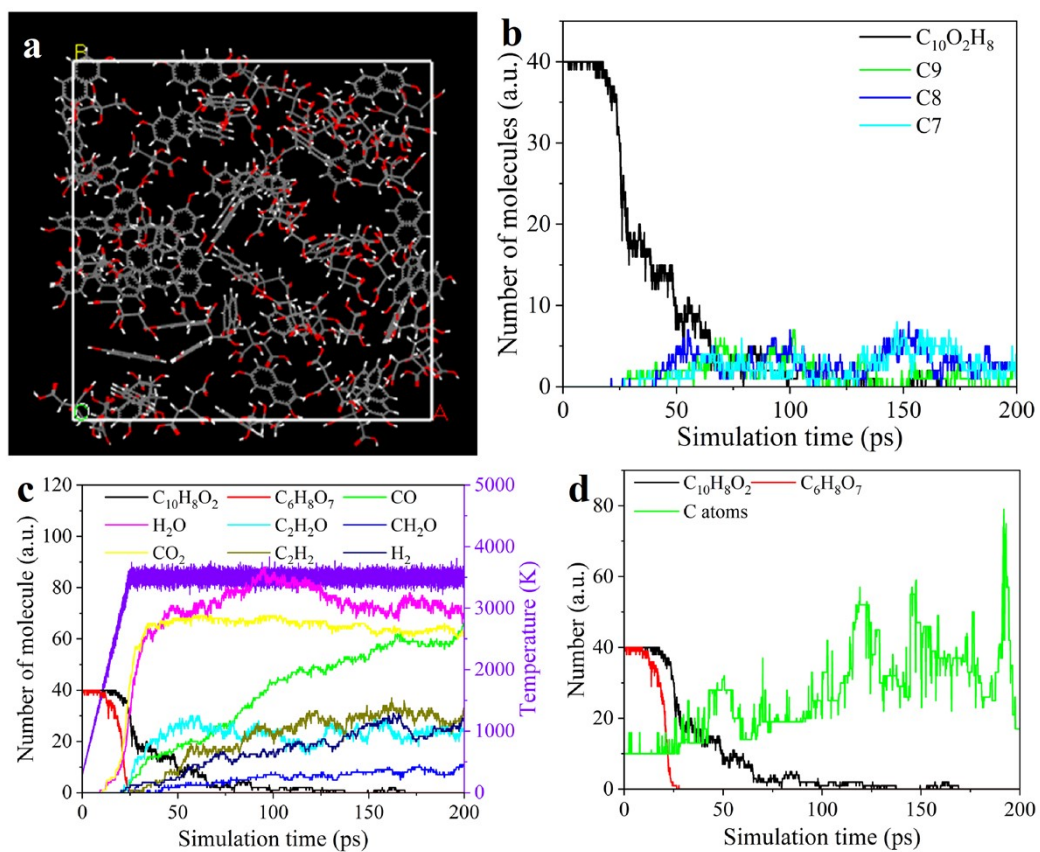

**Fig. S4.** (a) The simulation model; (b) The number of DHN molecules and their decomposition products; (c) Evolution curves of the number of different molecules and temperature as a function of simulation time; (d) The number of CA and DHN molecules and the number of C atoms for the largest molecule as a function of simulation time

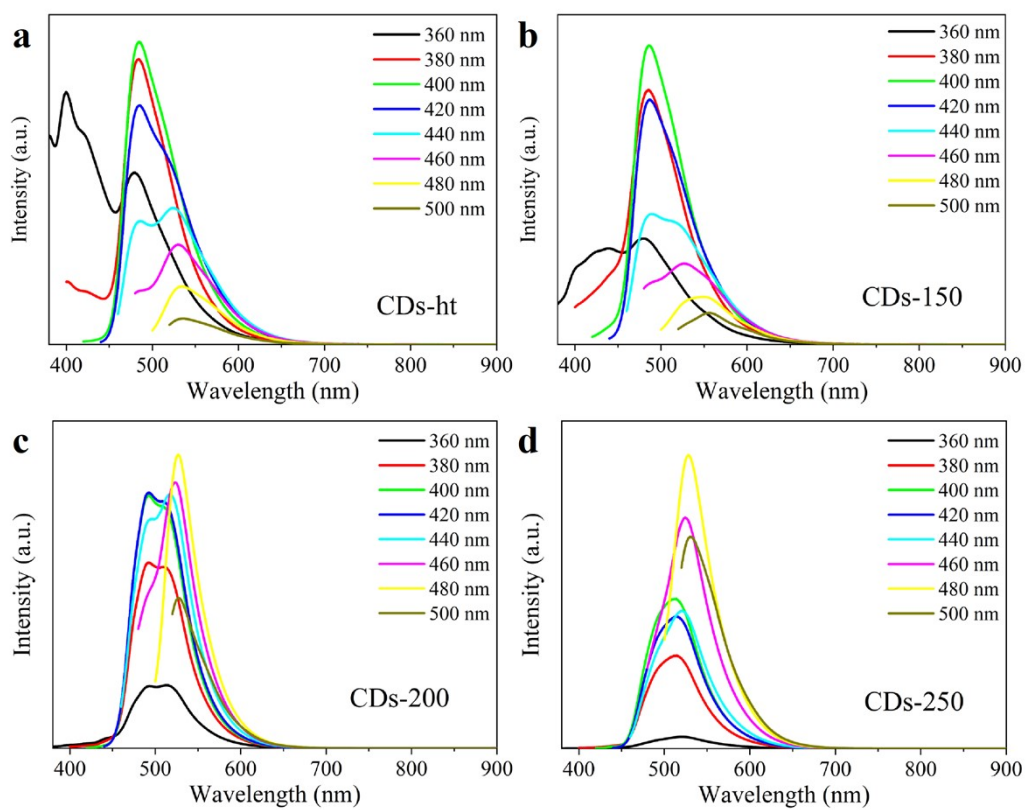

**Fig. S5.** PL emission spectra of (a) CDs-ht, (b) CDs-150, (c) CDs-200, and (d) CDs-250 under different excitation wavelengths

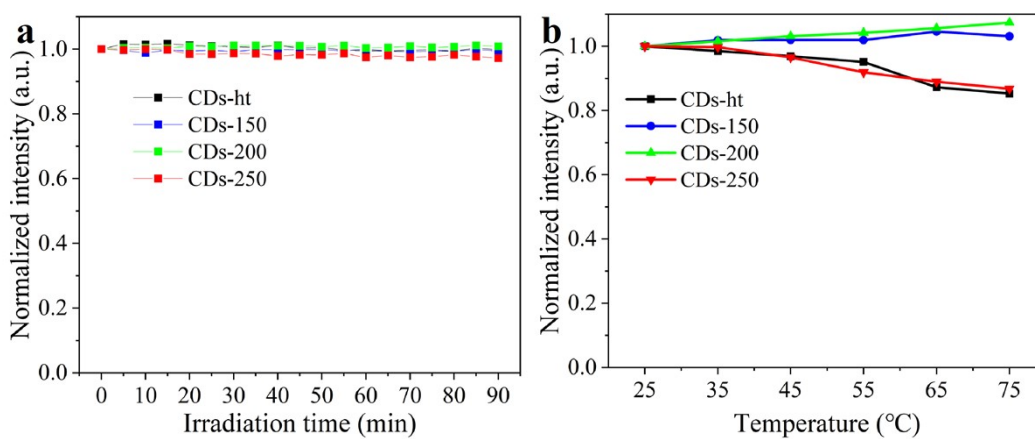

**Fig. S6.** PL intensity of CDs-ht, CDs-150, CDs-200, and CDs-250 under (a) continuous irradiation for 90 min under 450 nm and (b) different temperatures (from 25 to 75 °C with an interval of 10 °C)

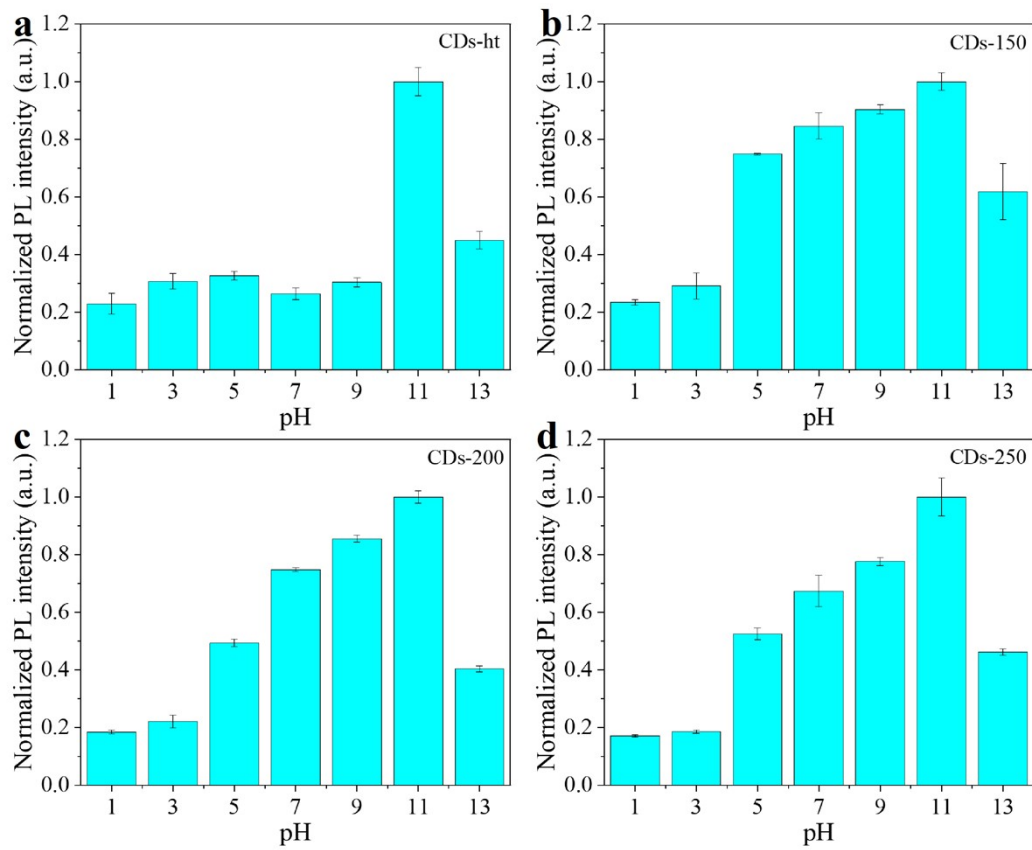

**Fig. S7.** PL intensity of (a) CDs-ht, (b) CDs-150, (c) CDs-200, and (d) CDs-250 under different pH

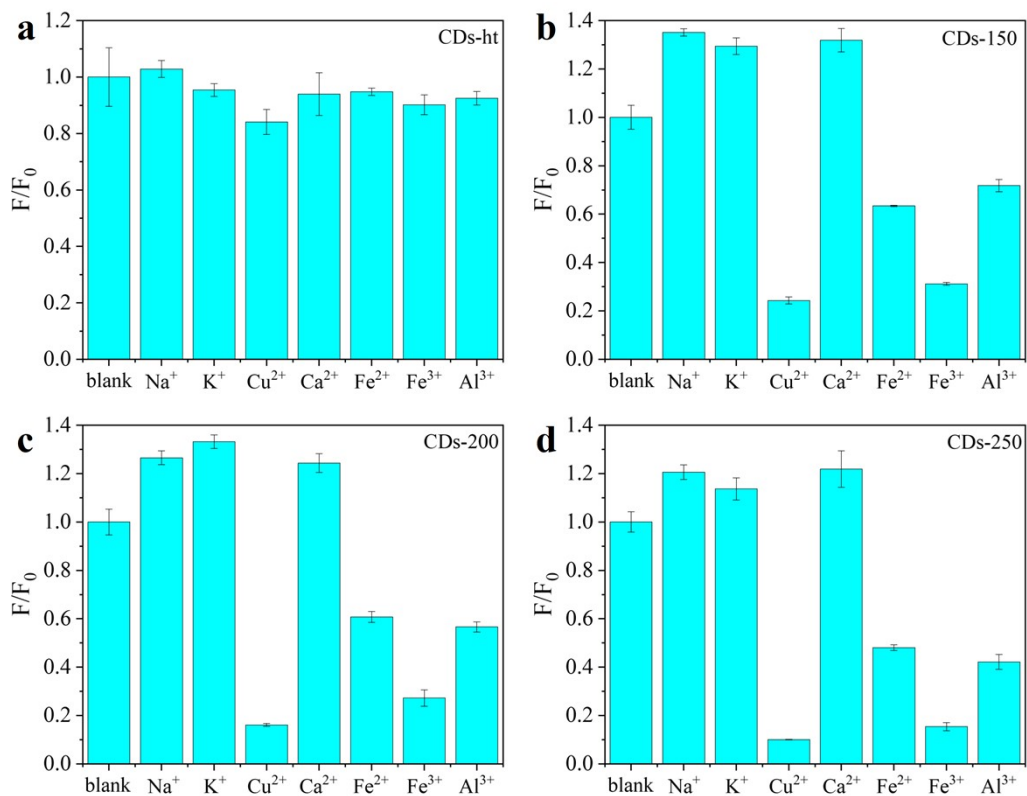

**Fig. S8.** PL intensity of (a) CDs-ht, (b) CDs-150, (c) CDs-200, and (d) CDs-250 under different metal ion solutions

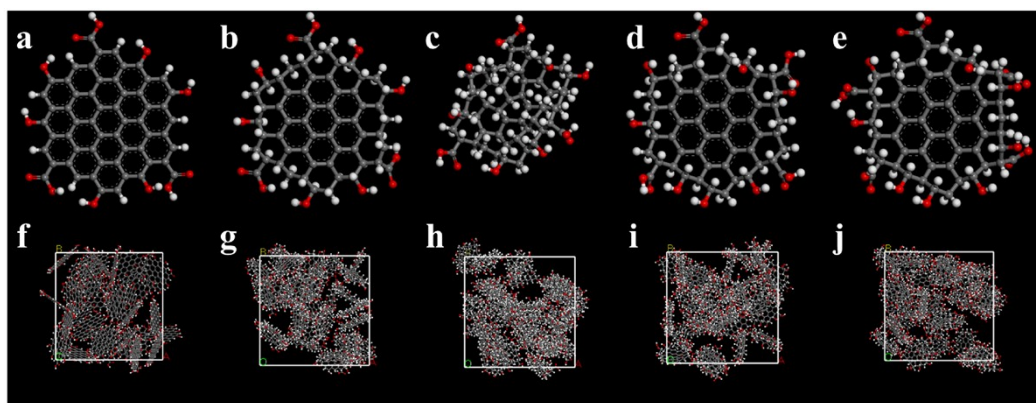

**Fig. S9.** (a–e) CD model with different structures; (f–j) Corresponding periodic boxes

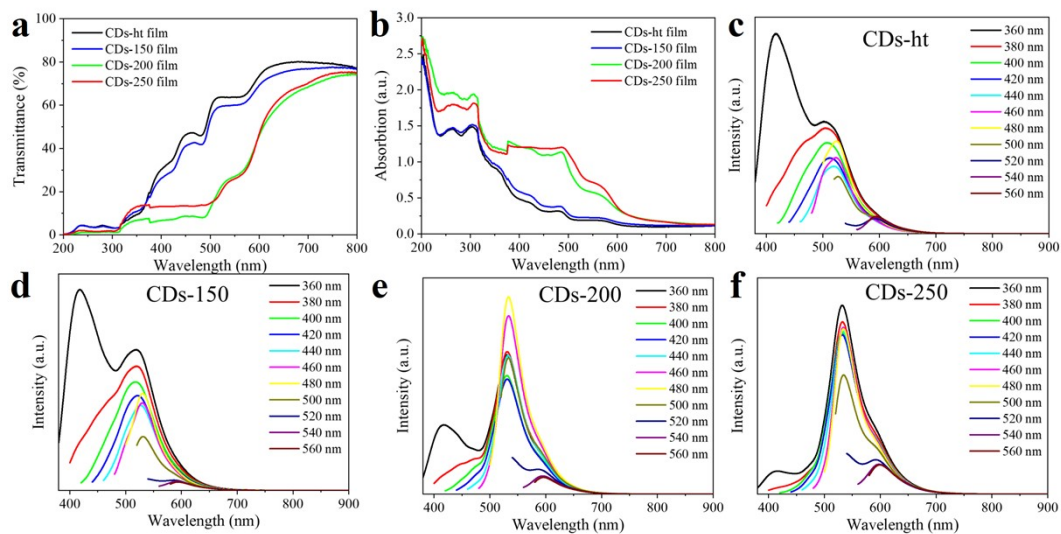

**Fig. S10.** (a) Transmittance and (b) UV-vis spectra of four CD films; (c–f) PL emission spectra of CD film under different excitation wavelengths

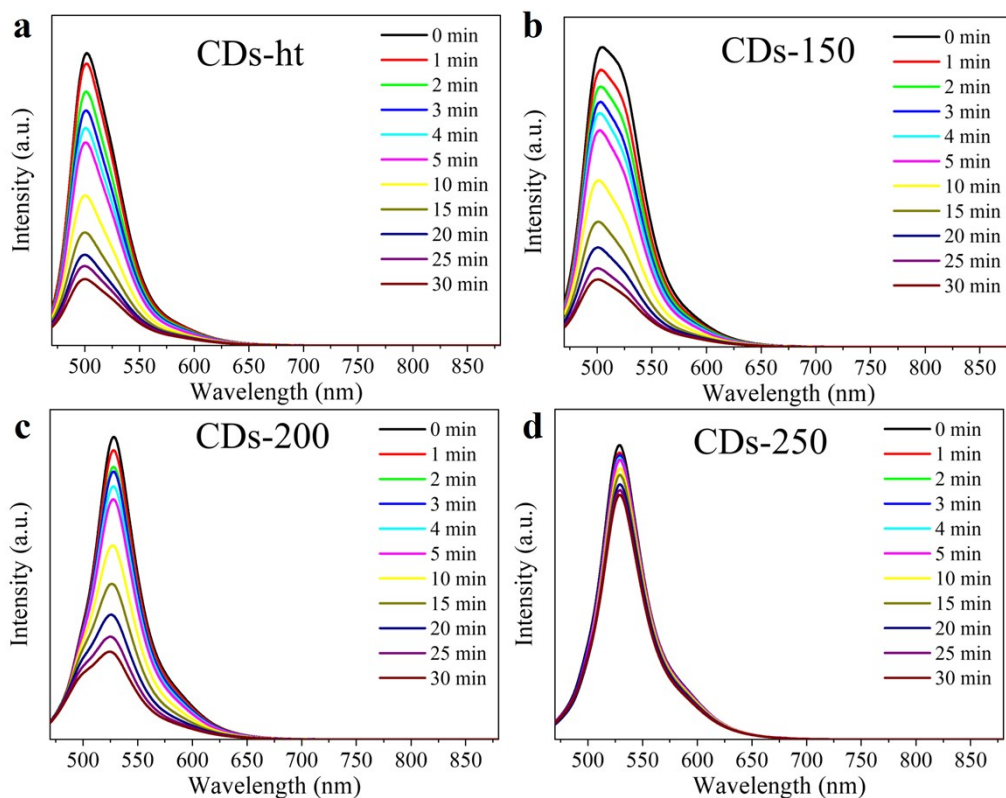

**Fig. S11.** PL intensity of stability of (a) CDs-ht film, (b) CDs-150 film, (c) CDs-200 film, and (d) CDs-250 film under 450 nm laser irradiation for 30 min



Table S1 WLD performance based on different laser wavelength and phosphors

| Laser wavelength<br>(nm) | Phosphors                    | CIE coordinate | CCT (K)  | CRI | Ref.      |
|--------------------------|------------------------------|----------------|----------|-----|-----------|
| 400                      | CDs and lanthanide complexes | (0.31, 0.32)   | —        | —   | [12]      |
| 405                      | GQDs                         | (0.34, 0.39)   | 5288     | 70  | [24]      |
| 450                      | LuAG/CASN                    | —              | 5600±300 | 84  | [51]      |
| 450                      | Nitride phosphor             | (0.33, 0.32)   | 5362     | 85  | [7]       |
| 455                      | CASN/LuAG                    | —              | 8665     | 89  | [20]      |
| 450                      | CDs                          | (0.42, 0.35)   | 2822     | 85  | This work |
